# Supplementary material for: Anti-CD19 CAR T cells potently redirected to kill solid tumor cells
Source: PubMed Central journal article supplement (PMC7971483; doi:10.1371/journal.pone.0247701), 2021-03-18

S1 Fig.

A)

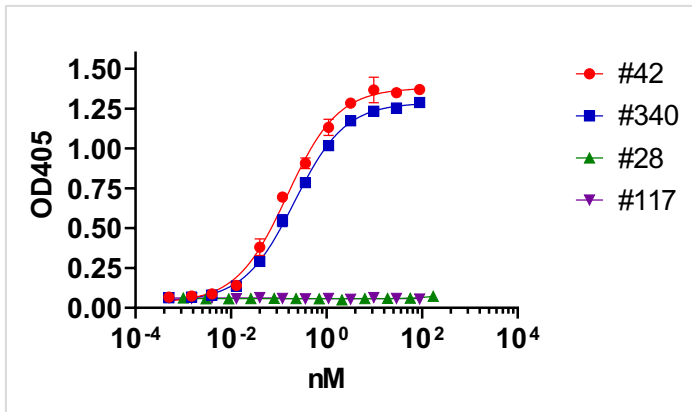

B)

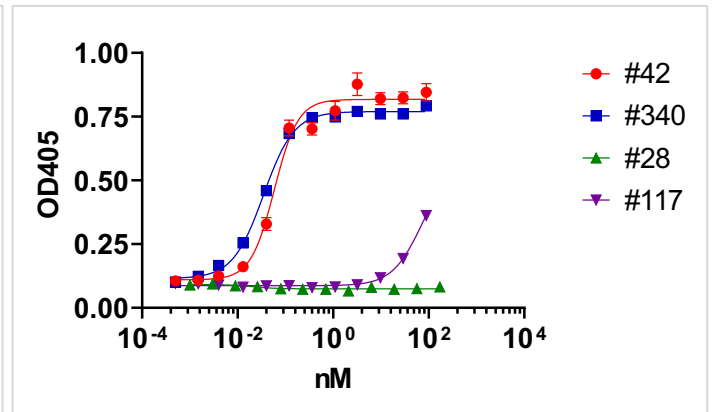

Supplement: pone.0247701.s001.pdf [file pone.0247701.s001.pdf]
