# Supplementary material for: Anti-CD19 CAR T cells potently redirected to kill solid tumor cells
Source: PubMed Central journal article supplement (PMC7971483; doi:10.1371/journal.pone.0247701), 2021-03-18

**S5 Fig.**

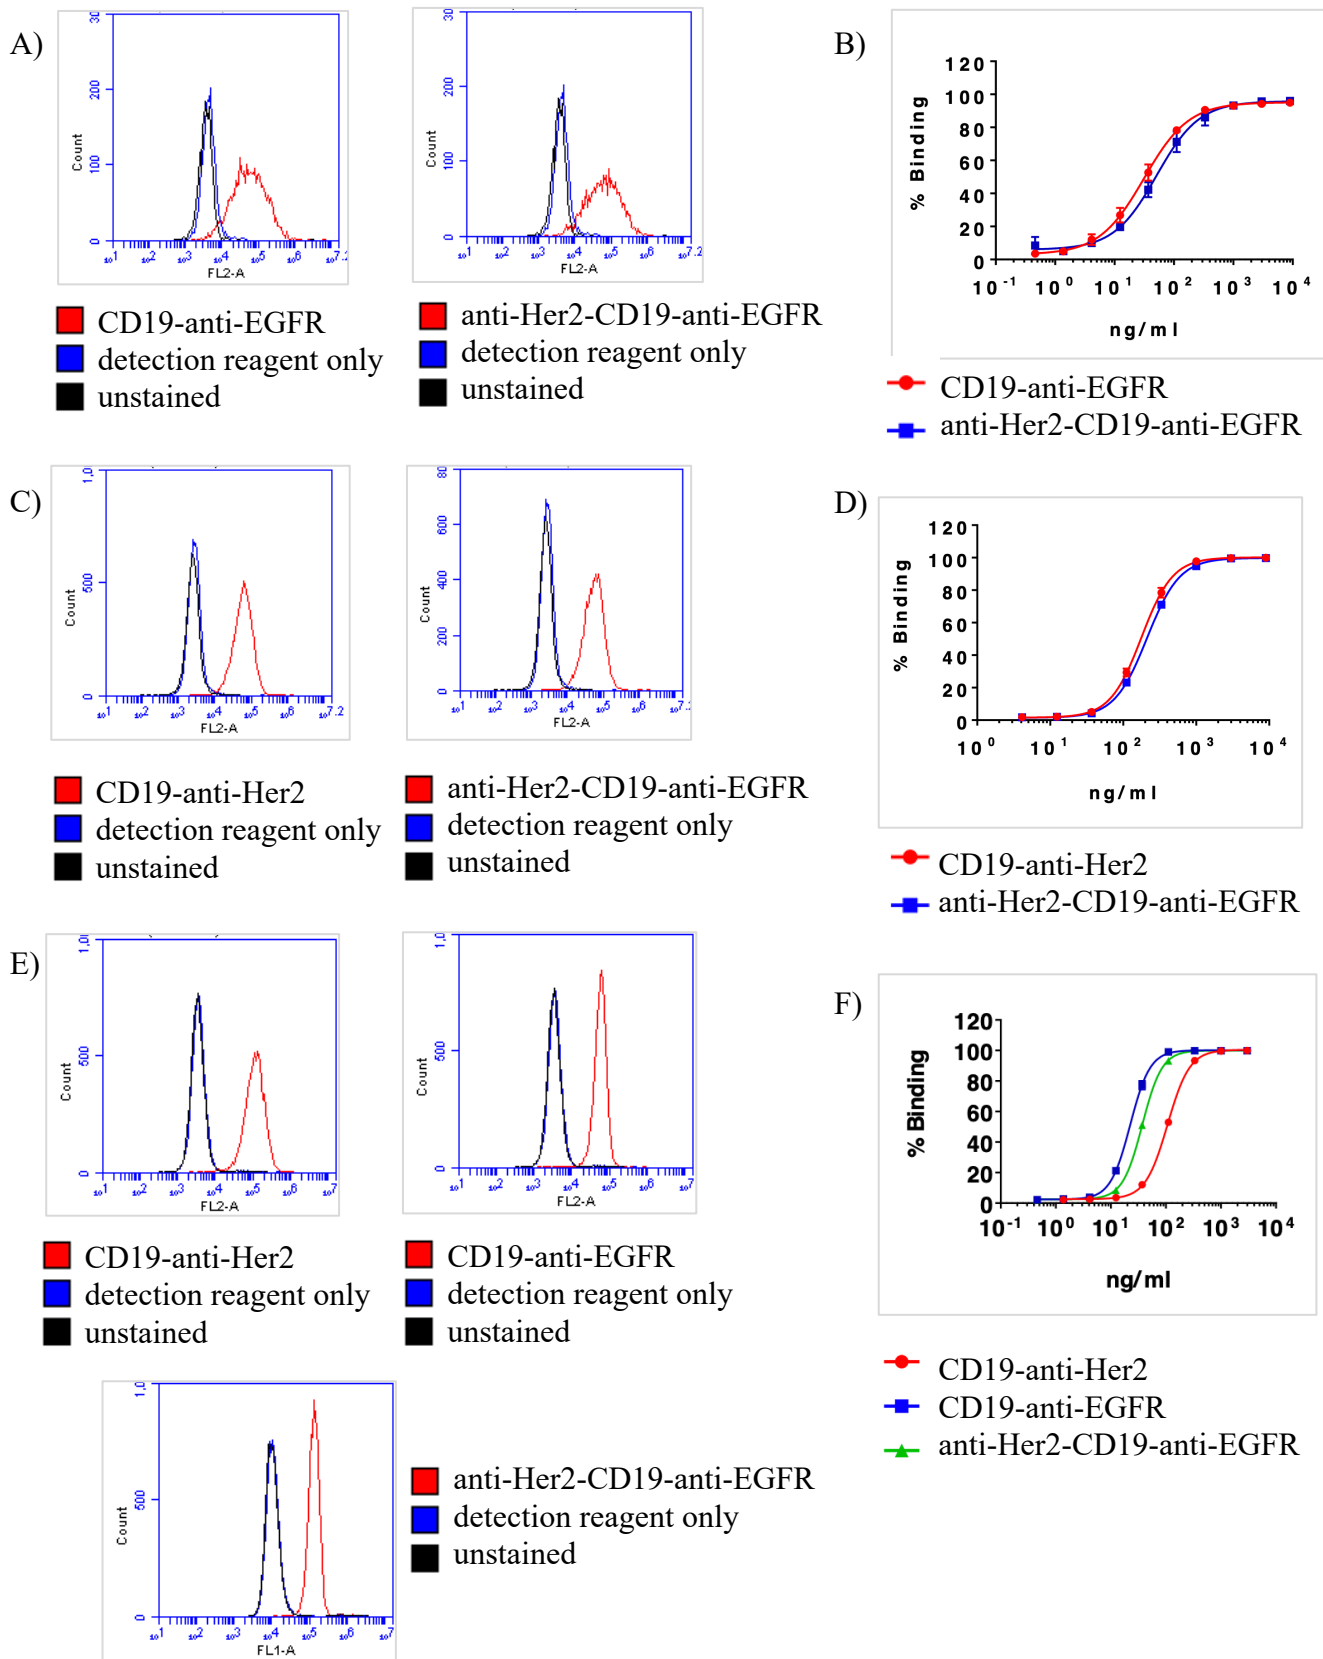

Supplement: pone.0247701.s005.pdf [file pone.0247701.s005.pdf]
