# Supplementary material for: Anti-CD19 CAR T cells potently redirected to kill solid tumor cells
Source: PubMed Central journal article supplement (PMC7971483; doi:10.1371/journal.pone.0247701), 2021-03-18
Supplement: pone.0247701.s007.pdf [file pone.0247701.s007.pdf]

S7 Fig.

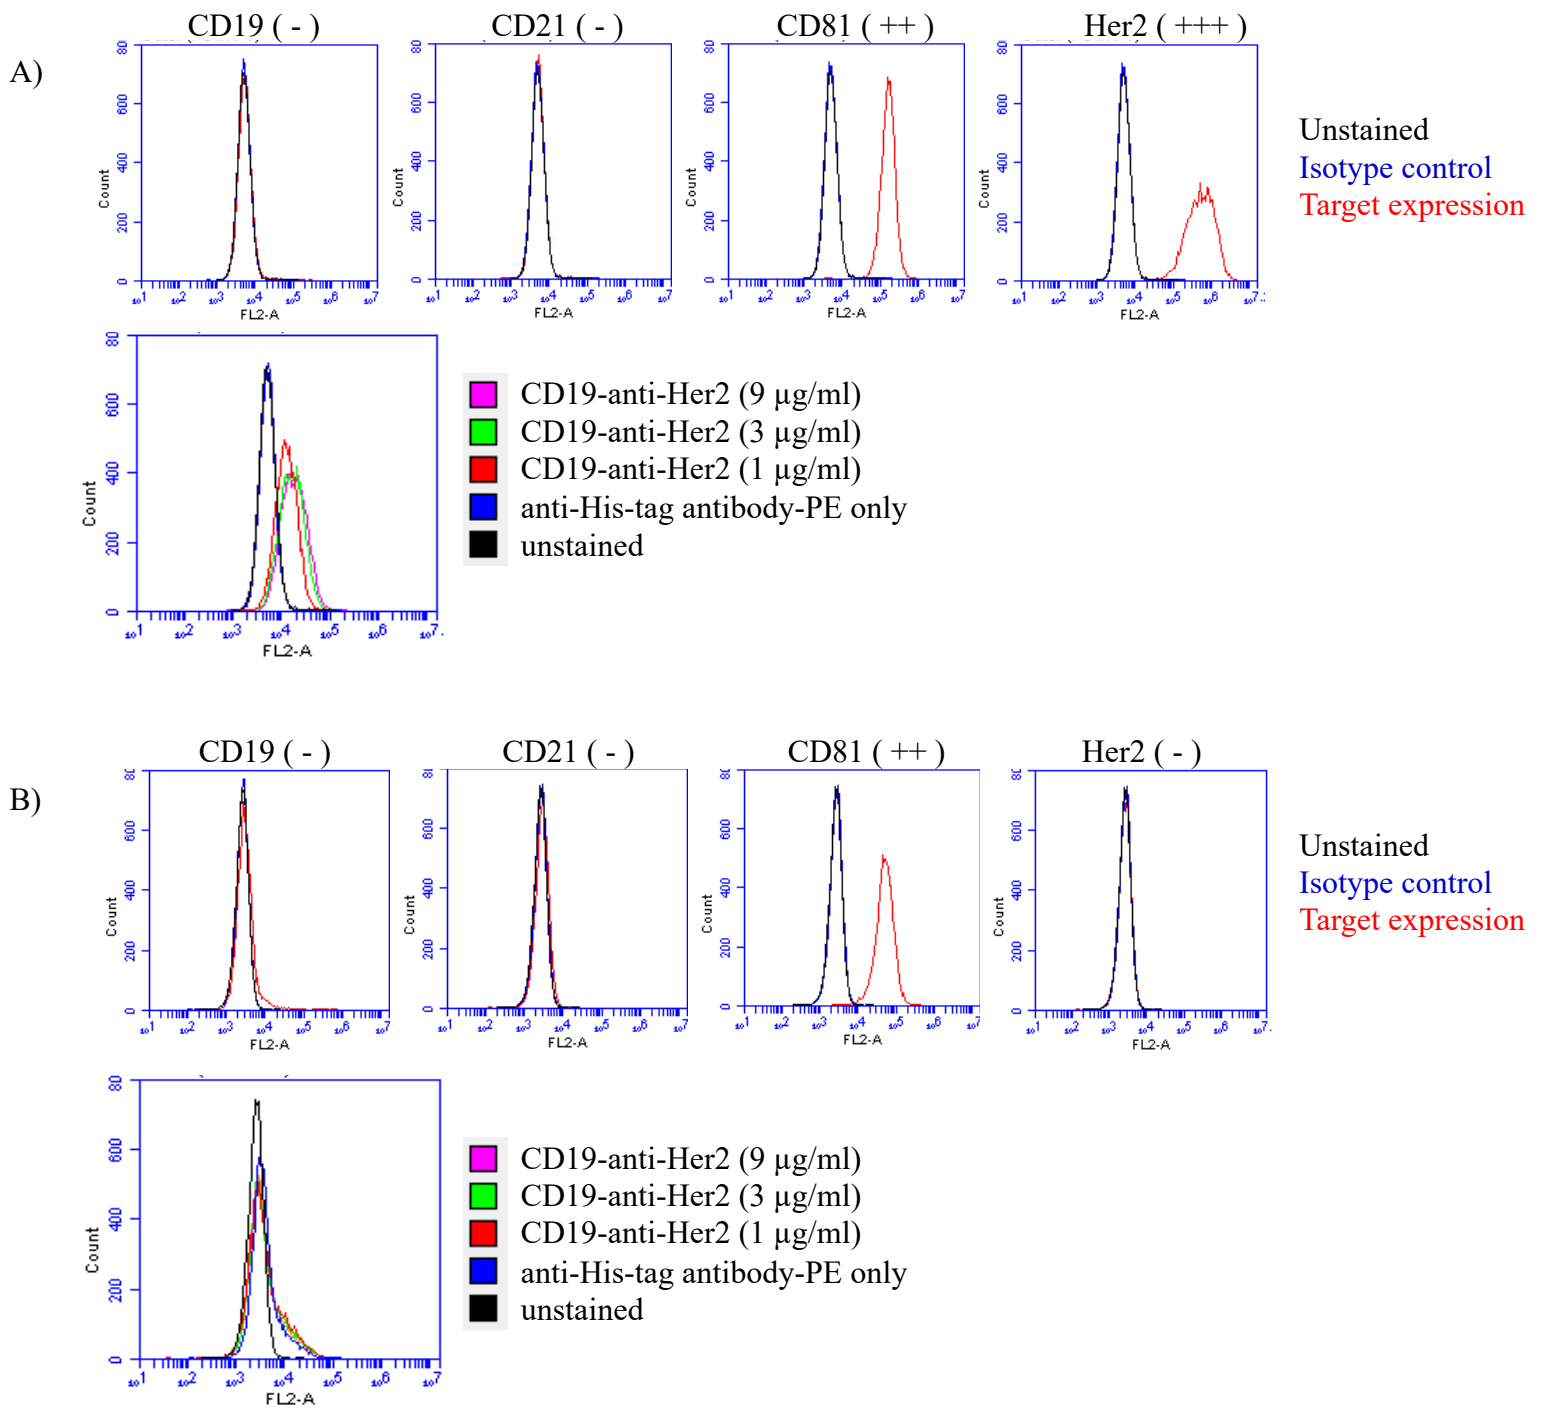

C)

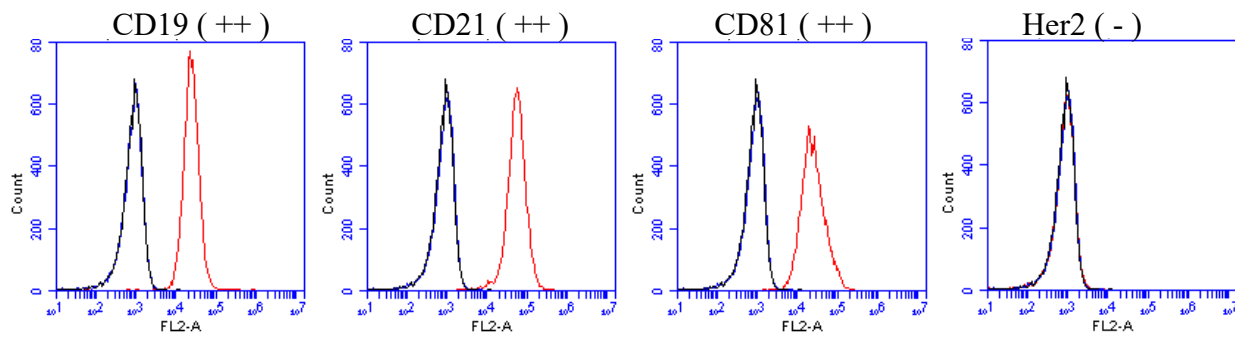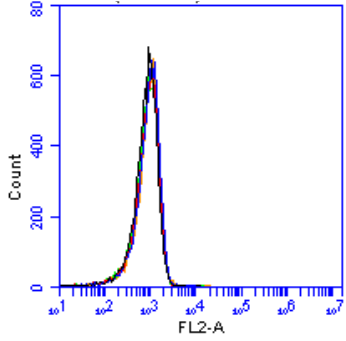

- CD19-anti-Her2 (9  $\mu\text{g/ml}$ )
- CD19-anti-Her2 (3  $\mu\text{g/ml}$ )
- CD19-anti-Her2 (1  $\mu\text{g/ml}$ )
- anti-His-tag antibody-PE only
- unstained

D)

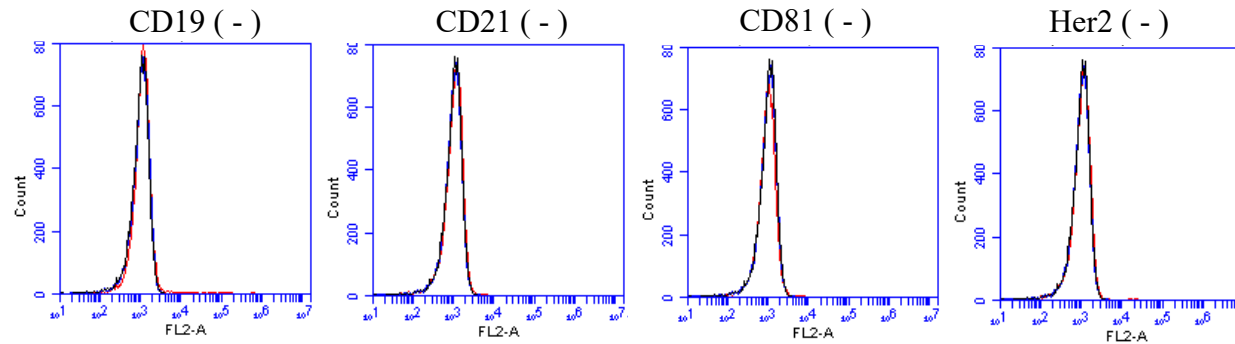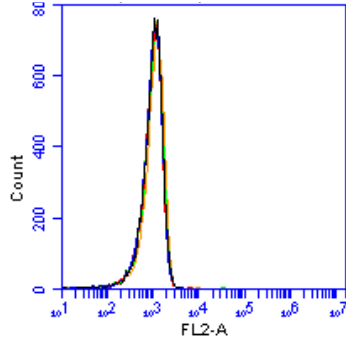

- CD19-anti-Her2 (9  $\mu\text{g/ml}$ )
- CD19-anti-Her2 (3  $\mu\text{g/ml}$ )
- CD19-anti-Her2 (1  $\mu\text{g/ml}$ )
- anti-His-tag antibody-PE only
- unstained

E)

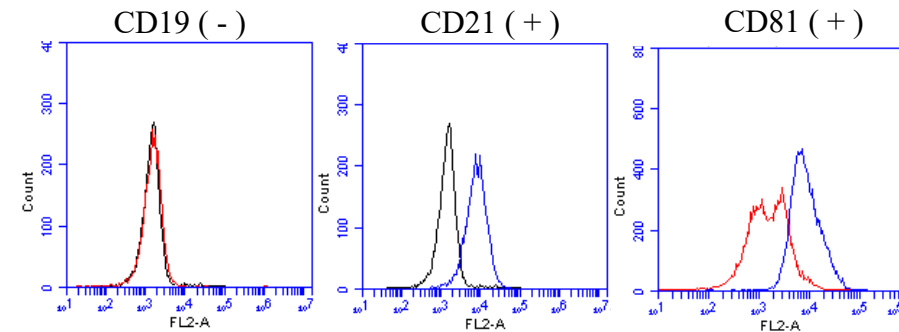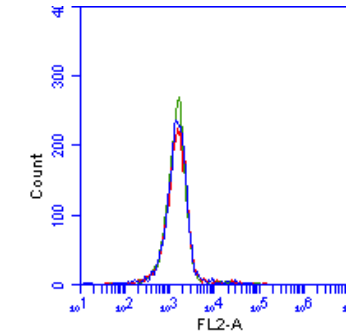

- anti-His-tag antibody-PE only
- CD19-anti-Her2 (1  $\mu\text{g/ml}$ , #340)
- CD19-anti-Her2 (1  $\mu\text{g/ml}$ , #42)

Unstained  
Isotype control  
Target expression

Unstained  
Isotype control  
Target expression

Unstained  
Isotype control  
Target expression
