# Supplementary material for: Anti-CD19 CAR T cells potently redirected to kill solid tumor cells
Source: PubMed Central journal article supplement (PMC7971483; doi:10.1371/journal.pone.0247701), 2021-03-18
Supplement: pone.0247701.s010.pdf [file pone.0247701.s010.pdf]

**S1 Table.** List of additional constructs used, with a description of the encoded sequences in column 2 and the format in which the expressed sequence is utilized in column 3. The long dashes indicate a linker sequence. P2A refers to a cleavage sequence. BP refers to a bridging protein.

| <b>Construct #</b> | <b>Description</b>                     | <b>Modality</b>  |
|--------------------|----------------------------------------|------------------|
| <b>28</b>          | CD19 ECD                               | Purified protein |
| <b>42</b>          | CD19 ECD – anti-Her2                   | Purified BP      |
| <b>117</b>         | CD22 ECD – anti-Her2                   | Purified BP      |
| <b>142</b>         | Sequence of 254 – P2A – sequence of 42 | CAR-CD19 + BP    |
| <b>311</b>         | Stabilized CD19 ECD – anti-Her2        | Purified BP      |
| <b>416</b>         | Stabilized CD19 ECD – anti-EGFR        | Purified BP      |
