# Supplementary material for: Anti-CD19 CAR T cells potently redirected to kill solid tumor cells
Source: PubMed Central journal article supplement (PMC7971483; doi:10.1371/journal.pone.0247701), 2021-03-18
Supplement: pone.0247701.s011.pdf [file pone.0247701.s011.pdf]

**S2 Table.** Summary of bridging protein binding to cell lines. Antigen expression is indicated as negative (-), dim (+), bright (++) or very bright (+++) or not done (nd). Binding of bridging proteins to cell lines was analyzed by flow cytometry as described in the text. The results are summarized as positive (+) or negative (-) for detectable binding.

| cell line | antigen expression |      |      |      |      | bridging protein binding to cell lines |      |
|-----------|--------------------|------|------|------|------|----------------------------------------|------|
|           | CD19               | CD20 | CD21 | CD81 | Her2 | #42                                    | #340 |
| SKOV3     | -                  | -    |      | ++   | +++  | +                                      | +    |
| K562      | -                  | -    |      | ++   | -    | -                                      | -    |
| Raji      | ++                 | ++   | ++   | ++   | -    | -                                      | -    |
| U937      | -                  | -    | -    | -    | -    | -                                      | -    |
| OCI-Ly3   | -                  | ++   | +    | +    | nd   | -                                      | -    |
